# Supplementary material for: Burn severity and vegetation type control phosphorus concentration, molecular composition, and mobilization
Source: Copernicus journal article supplement (doi:10.5194/egusphere-2025-21), 2025-01-29
Supplement: Supplementary file 1 [file egusphere-2025-21-supplement.pdf]

# **Burn severity and vegetation type control phosphorus concentration, molecular composition, and mobilization**

Morgan E. Barnes<sup>1</sup>, J. Alan Roebuck, Jr.<sup>2</sup>, Samantha Grieger<sup>2</sup>, Paul J. Aronstein<sup>3</sup>, Vanessa A. Garayburu-Caruso<sup>1</sup>, Kathleen Munson<sup>2</sup>, Robert P. Young<sup>1</sup>, Kevin D. Bladon<sup>4</sup>, John D. Bailey<sup>4</sup>, Emily B. Graham<sup>1,5</sup>, Lupita Renteria<sup>1</sup>, Peggy A. O'Day<sup>3</sup>, Timothy D. Scheibe<sup>1</sup>, Allison N. Myers-Pigg<sup>2,6</sup>

1 Pacific Northwest National Laboratory, Richland, WA, USA

2 Pacific Northwest National Laboratory, Sequim, WA, USA

3 Environmental Systems, University of California - Merced, Merced, CA, USA

4 College of Forestry, Oregon State University, Corvallis, OR, USA

5 School of Biological Sciences, Washington State University, Pullman, WA, USA

6 Department of Environmental Sciences, University of Toledo, Toledo, OH, USA

*Correspondence to:*

Allison Myers-Pigg ([allison.myers-pigg@pnnl.gov](mailto:allison.myers-pigg@pnnl.gov))

Morgan Barnes ([morgan.barnes@pnnl.gov](mailto:morgan.barnes@pnnl.gov))

*Present Addresses:*

J. Alan Roebuck, Jr – U.S. Geological Survey, Lower-Mississippi-Gulf Water Science Center, Nashville, TN, 37211

Robert P. Young – Washington River Protection Solutions, P.O. Box 850 MSIN M0-01, Richland, WA 99354

## **Supplemental Information**

### *Carbon and Nitrogen Concentration Methods*

Total carbon (C) and nitrogen (N) of the solid samples were measured on an elemental analyzer (ECS 8020; NC technologies, Italy). Leachate aqueous phase dissolved organic carbon (DOC) and total dissolved nitrogen (TDN) were determined on a Shimadzu TOC-L Total Organic Carbon Analyzer.

### *NMR Methodology*

Solution <sup>31</sup>P nuclear magnetic resonance (NMR) experiments were run at the Environmental Molecular Science Laboratory (Pacific Northwest National Laboratory Richland Campus) on an Agilent DD2 spectrometer operated at a field strength of 14.1 T (600.18 MHz <sup>1</sup>H, 242.95 MHz <sup>31</sup>P) using a Varian 5 mm direct detect probe. A standard one-dimensional (1D) pulse and acquire experiment was employed using a 90° hard pulse (calibrated using the orthophosphate naturally present in each sample), an acquisition time of 0.6 s (6,098 complex points), a spectral width of 42 ppm (10.2 kHz), and relaxation delay equal to 5 times the measured T<sub>1</sub> relaxation constant minus the acquisition time. Each experiment was acquired for approximately 16 hours and the number of transients co-added for each spectrum was dependent on the T<sub>1</sub> for each individual sample.

Post-acquisition processing included setting the orthophosphate peak to 6.0 ppm, phasing, baseline correction, and line-broadening of 10 Hz using MNova 14.0.1 (Mestrelab Research, Spain). Chemical shifts of P species were compared to published literature for identification and assignments were confirmed via spiking experiments.(Cade-Menun, 2015; Doolette et al., 2009) Spiking experiments were conducted by sequentially adding solutions containing known compounds from commercial sources (Figure S2). These known P compounds were dissolved in the reconstitution buffer at concentrations of approximately 60 mM and added in 5–10  $\mu$ L amounts to samples after initial sample NMR measurements. Spiked compounds, along with their chemical shifts and standard deviations, included DL- $\alpha$ -glycerophosphate ( $4.92 \pm 0.05$  ppm),  $\beta$ -glycerophosphate ( $4.58 \pm 0.03$  ppm), RNA ( $4.50 \pm 0.06$  ppm,  $4.33 \pm 0.03$  ppm; mononucleotide degradation products), glucose-6-phosphate ( $5.15 \pm 0.01$  ppm), glucose-1-phosphate (3.27 ppm), phytate ( $5.58 \pm 0.02$  ppm,  $4.60 \pm 0.02$  ppm,  $4.30 \pm 0.20$  ppm,  $3.89 \pm 0.02$  ppm), phosphocholine ( $3.90 \pm 0.01$  ppm), and adenosine monophosphate ( $4.42 \pm 0.05$  ppm).

Organic P moieties were grouped into orthophosphate monoester (monoester) or orthophosphate diester (diester) regions (Figure S2). The monoester region relative percent was calculated by integrating from 10.0 to 2.5 ppm and subtracting the orthophosphate (6 ppm) peak area. The diester region was integrated from 2.5 to -2.2. Degradation of diesters (RNA and phospholipids) to monoesters occurs in the highly alkaline extraction and reconstitution solutions and may continue during the duration of the NMR experiment.(Doolette et al., 2009; Turner et al., 2003) As a result, we corrected for this by shifting the deconvoluted areas of  $\alpha$ -glycerophosphate,  $\beta$ -glycerophosphate, and mononucleotide peaks from the monoester to diester region.(Cade-Menun, 2015; Recena et al., 2018) Specific P moieties were identified and quantified with the peak picking function and any missing peaks were added by hand.

### *XANES Methodology*

Finely ground unburned solid and char samples and reference compounds were smeared to form a homogeneous thin film on P-free tape and then mounted to an aluminum sample holder. Bulk spectra were collected in a helium gas environment at room temperature until adequate signal to noise ratio was achieved (between 2 to 16 scans). A monochromator consisting of double crystal Si (III) and spectra were recorded in fluorescence mode using a 7 element Vortex detector.

Multiple internal reference compounds were used; spectra were energy shifted for the white line of hydroxyapatite to occur at 2152.3 eV, sodium phosphate monobasic at 2152.7, and sodium pyrophosphate at 2152.5. Spectral scans were averaged in SixPack(Webb, 2005), followed by energy calibration and normalization using the Athena Software Program.(Ravel and Newville, 2005) Phosphorus speciation was estimated first with the fit\_athena function in the R package 'LCF'(Werner F, 2017) using all reference compounds ( $n = 46$ ) and samples ( $n = 64$ ) in Grieger et al.(Grieger et al., 2022) to identify a subset of likely compounds solid samples are composed of ( $n = 26$ ; Table S3). This subset of reference compounds was used to perform linear combination fits in Athena (Figure S3).

Previous studies have noted that differentiating reference compound spectra in complex matrices can be challenging, particularly among organic P species.(Kruse et al., 2015) However, lack of inclusion of multiple organic and inorganic compounds of a given metal within the reference compound library can result in erroneous fits and underestimation of the contributions from metal and organic P species.(Prietzl and Klysubun, 2018) Hence, we collected a large reference library of inorganic and organic species associated with Ca, Al, Fe, Mn, K, and Na and then

classified individual reference compounds into groups based on the associated metal for inorganic P (Pi) and kept all organic P (Po) as a separate category regardless of the metal association in the linear combination fit (Figure S3; Table S3).

### *Method Limitations*

NMR and XANES are complimentary techniques that help to gain a better understanding of Po and Pi species in environmental samples. NMR allows for measuring the detailed composition of the organic pool, such as differentiating DNA from phytate, but is only capable of classifying inorganic species as orthophosphate and polyphosphates (such as pyrophosphate). NMR has better resolution for Po when conducted in solution, which requires extracting solid samples and potentially altering them or leaving some P unextracted.(Cade-Menun, 2015) On the other hand, XANES has the advantage of measuring the bonding environment of all P atoms in unaltered solid samples, however there are challenges to identifying organic P species(Kruse et al., 2015) (see discussion in SI XANES Methodology section). Although we used both of these techniques on the solid samples, the NMR extraction efficiencies indicate we are quantifying as low as 41.5 (16.2)% for Douglas fir forest high severity chars (Table S1). Notably, the extraction efficiencies significantly decreased as Ca-Pi (measured by XANES) increased (linear model:  $p < 0.001$ ,  $r^2 = 0.46$ ), which is poorly soluble in alkaline solutions and has been observed in soil studies.(McDowell et al., 2007) Therefore, we are preferentially extracting Po and other non-Ca-containing compounds, which are primarily found in unburned and lower severity char samples. This means we are underestimating Pi in char samples when quantified by NMR relative to XANES.

|                    | Unburned                                                                          | Low                                                                               | Moderate                                                                           | High                                                                                |
|--------------------|-----------------------------------------------------------------------------------|-----------------------------------------------------------------------------------|------------------------------------------------------------------------------------|-------------------------------------------------------------------------------------|
| Douglas-fir Live   |  |  |  |  |
| Douglas-fir Litter |  |  |  |  |
| Big Sagebrush      |  |  |  | N/A                                                                                 |

Figure S1. Representative photos of Douglas-fir forest (composed of litter and live plant material) and Sagebrush shrubland (composed of big sagebrush) for each burn severity classification. Sagebrush shrubland did not reach high severity in our open-air burn experiments.

| Burn Severity | Vegetation          | P (%)       | n |
|---------------|---------------------|-------------|---|
| Unburned      | Douglas-fir forest  | 87.4 (7.0)  | 2 |
|               | Sagebrush shrubland | 105.9       | 1 |
| Low           | Douglas-fir forest  | 44.9 (14.1) | 5 |
|               | Sagebrush shrubland | 74.5 (13.3) | 2 |
| Moderate      | Douglas-fir forest  | 43.5 (21.6) | 3 |
|               | Sagebrush shrubland | 61.0 (9.8)  | 2 |
| High          | Douglas-fir forest  | 41.5 (16.2) | 4 |

Table S1. The P extraction efficiency mean (standard deviation) is reported as the proportion (%) of total P in the NaOH-EDTA extracts from solution  $^{31}\text{P}$  NMR analysis relative to the aqua-regia digested solid samples. The number of samples (n) is also reported.

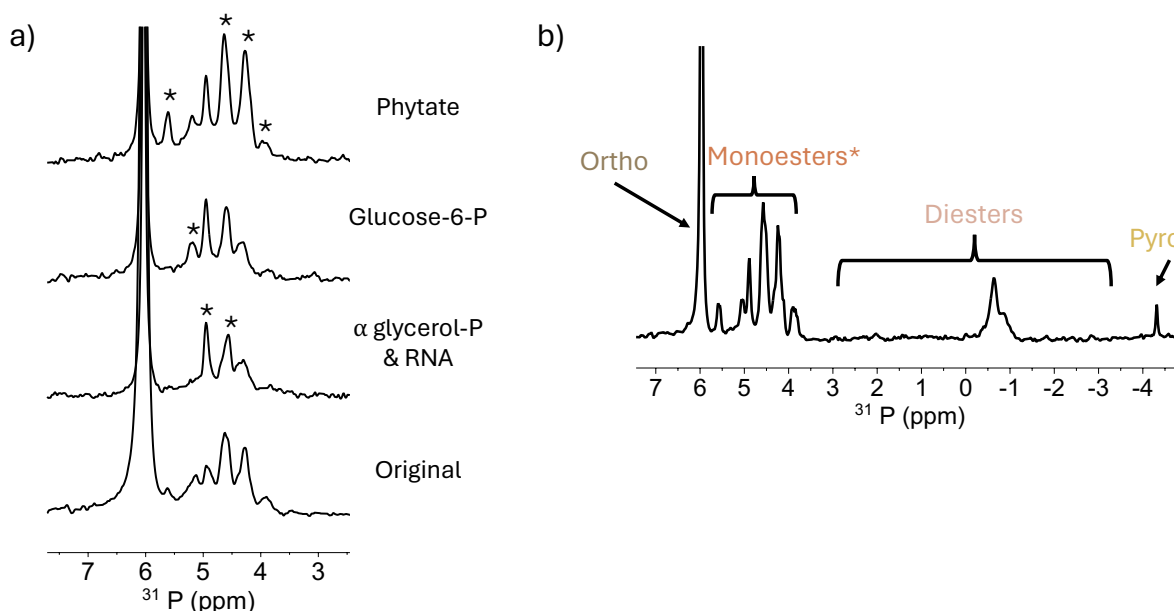

Figure S2.  $^{31}\text{P}$  solution NMR a) an example spiking experiment showing the original sample that was subsequently spiked with DL- $\alpha$ -glycerophosphate ( $4.92 \pm 0.05$  ppm), RNA ( $4.50 \pm 0.06$  ppm,  $4.33 \pm 0.03$  ppm; mononucleotide degradation products), glucose-6-phosphate ( $5.15 \pm 0.01$  ppm), and phytate ( $5.58 \pm 0.02$  ppm,  $4.60 \pm 0.02$  ppm,  $4.30 \pm 0.20$  ppm,  $3.89 \pm 0.02$  ppm) to identify sample composition of the monoester region; and b) identification of orthophosphate (6 ppm), monoester region (10.0 to 2.5 ppm), diester region (2.5 to -2.2 ppm), and pyrophosphate ( $-4.2 \pm 0.07$  ppm). Orthophosphate and pyrophosphate are inorganic species (brown colors) and monoester and diesters are organic species (orange colors). Chemical shifts are reported as the mean (standard deviation) across all samples and spectra are presented with 10 Hz line broadening. \*Note the monoester region may contain diester degradation products, which were corrected for. See SI NMR Methods and Method Limitation sections for additional details.

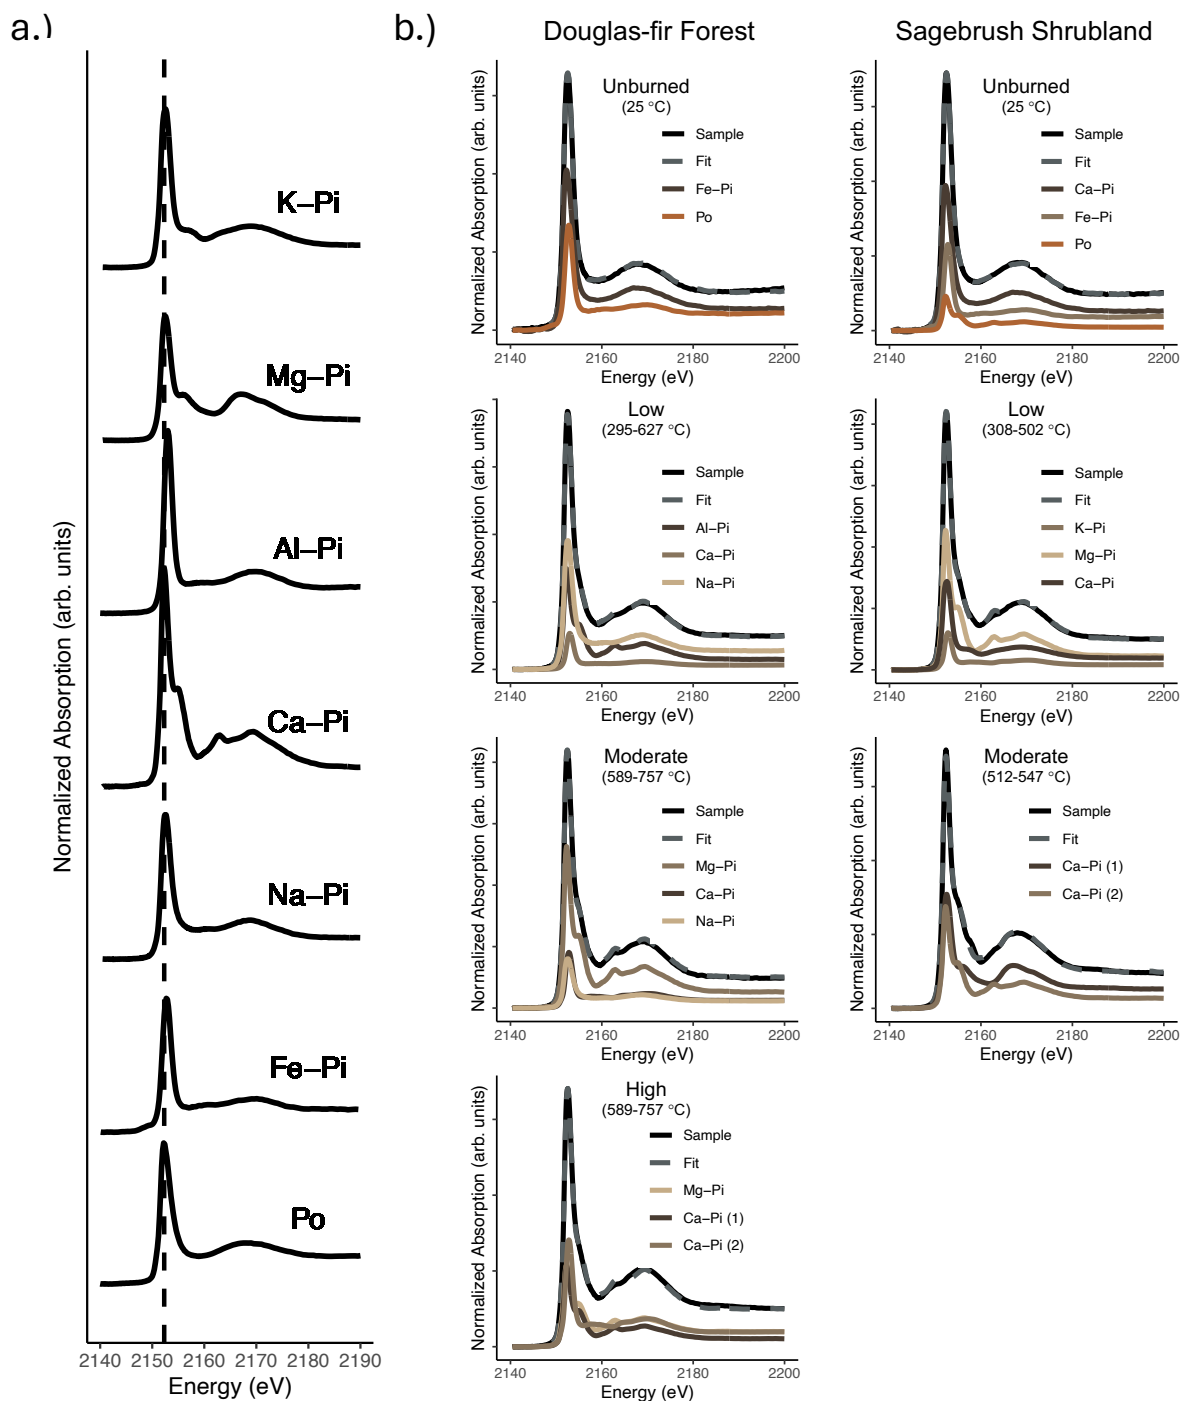

Figure S3. Phosphorus K-edge XANES (a) reference compounds representing K, Mg, Al, Ca, Na, and Fe inorganic P (Pi) along with an organic P species (Po). The vertical dashed line represents the white line of hydroxyapatite at 2152.3 eV, which was used as an internal reference compound; and (b) example linear combination fits for each burn severity experienced by Douglas-fir forest and Sagebrush shrubland. Data (black line), linear combination best fit (dashed gray line), and spectral deconvolution of the reference compounds (colored lines) are presented.

| Burn Severity | Vegetation          | #  | Al-GibbSorb (Al-Pi) | Apatite-CaDefHydroxy (Ca-Pi) | Apatite-Carbonate (Ca-Pi) | Ca-Octa (Ca-Pi) | Ca-Tri (Ca-Pi) | Fe-FerriSorb (Fe-Pi) | Fe-GoethSorb (Fe-Pi) | K-Di (K-Pi) | K-Pyro (K-Pi) | Mg-Di (Mg-Pi) | Mg-Tri (Mg-Pi) | NH4-Mg (Mg-Pi) | Na-Tri (Na-Pi) | Ca-Lecit (Po) | Na-AMP (Po) | Sum   | R Factor |
|---------------|---------------------|----|---------------------|------------------------------|---------------------------|-----------------|----------------|----------------------|----------------------|-------------|---------------|---------------|----------------|----------------|----------------|---------------|-------------|-------|----------|
| Unburned      | Douglas-fir forest  | 12 | 0                   | 5.1                          | 0                         | 0               | 0              | 0                    | 36.8                 | 0           | 0             | 0             | 0              | 0              | 0              | 0             | 60.7        | 102.6 | 0.00058  |
|               |                     | 13 | 0                   | 0                            | 0                         | 0               | 0              | 0                    | 43.3                 | 0           | 0             | 0             | 0              | 0              | 0              | 0             | 57.8        | 101.1 | 0.00078  |
|               | Sagebrush shrubland | 14 | 0                   | 9                            | 0                         | 0               | 0              | 0                    | 37.1                 | 0           | 0             | 0             | 0              | 0              | 0              | 0             | 55.1        | 101.2 | 0.00031  |
| Low           | Douglas-fir forest  | 1  | 0                   | 27.9                         | 0                         | 0               | 0              | 0                    | 0                    | 0           | 0             | 0             | 38.2           | 0              | 0              | 34            | 0           | 100.1 | 0.00039  |
|               |                     | 7  | 12.7                | 29.7                         | 0                         | 0               | 0              | 0                    | 0                    | 0           | 0             | 0             | 0              | 0              | 57.1           | 0             | 0           | 99.5  | 0.00047  |
|               |                     | 8  | 8.7                 | 31                           | 0                         | 0               | 0              | 0                    | 0                    | 0           | 0             | 0             | 0              | 0              | 62             | 0             | 0           | 101.7 | 0.00062  |
|               |                     | 10 | 0                   | 39.6                         | 0                         | 0               | 0              | 11.8                 | 0                    | 0           | 0             | 0             | 0              | 0              | 48.7           | 0             | 0           | 100.1 | 0.00037  |
|               | Sagebrush shrubland | 51 | 0                   | 40                           | 0                         | 0               | 0              | 0                    | 0                    | 0           | 0             | 0             | 26.1           | 0              | 32.7           | 0             | 0           | 98.8  | 0.00053  |
|               |                     | 9  | 0                   | 37.6                         | 0                         | 0               | 0              | 0                    | 0                    | 0           | 0             | 0             | 0              | 23             | 39.7           | 0             | 0           | 100.3 | 0.00103  |
|               |                     | 11 | 0                   | 45.2                         | 0                         | 0               | 0              | 0                    | 0                    | 0           | 39.4          | 0             | 17.2           | 0              | 0              | 0             | 0           | 101.8 | 0.00064  |
| Moderate      | Douglas-fir forest  | 2  | 0                   | 52.3                         | 0                         | 0               | 0              | 0                    | 0                    | 0           | 0             | 0             | 25.7           | 0              | 24             | 0             | 0           | 102   | 0.00069  |
|               |                     | 52 | 0                   | 39.3                         | 0                         | 0               | 0              | 0                    | 0                    | 0           | 0             | 0             | 40.5           | 0              | 0              | 20.6          | 0           | 100.4 | 0.00052  |
|               |                     | 58 | 8.9                 | 44.8                         | 0                         | 0               | 0              | 0                    | 0                    | 0           | 0             | 0             | 0              | 0              | 44.1           | 0             | 0           | 97.8  | 0.00048  |
|               | Sagebrush shrubland | 68 | 0                   | 27.4                         | 0                         | 17.7            | 0              | 0                    | 0                    | 0           | 0             | 0             | 0              | 53.6           | 0              | 0             | 0           | 98.7  | 0.00119  |
|               |                     | 72 | 0                   | 27.3                         | 17.7                      | 0               | 0              | 0                    | 0                    | 0           | 0             | 0             | 0              | 53.7           | 0              | 0             | 0           | 98.7  | 0.00225  |
| High          | Douglas-fir forest  | 50 | 0                   | 21.1                         | 0                         | 0               | 39.6           | 0                    | 0                    | 0           | 0             | 0             | 40             | 0              | 0              | 0             | 0           | 100.7 | 0.00092  |
|               |                     | 67 | 0                   | 53.6                         | 0                         | 0               | 0              | 0                    | 0                    | 28          | 0             | 17.6          | 0              | 0              | 0              | 0             | 0           | 99.2  | 0.00074  |
|               |                     | 71 | 0                   | 55.6                         | 0                         | 0               | 0              | 0                    | 0                    | 0           | 0             | 0             | 33.8           | 0              | 0              | 10.2          | 0           | 99.6  | 0.00058  |
|               |                     | 73 | 0                   | 41.1                         | 0                         | 0               | 0              | 0                    | 34.8                 | 0           | 0             | 0             | 0              | 24.4           | 0              | 0             | 0           | 100.3 | 0.00072  |

Table S2. XANES linear combination fit results for solid samples. Samples are grouped by their burn severity, vegetation type, and sample number (as used in data packages.(Grieger et al., 2022) Only reference compounds identified in the samples are reported. See Table S3 for reference compound details, including the molecular composition. The groupings (i.e., Al-Pi, Ca-Pi, Fe-Pi, K-Pi, Mg-Pi, Na-Pi, and Po) are reported next to the reference compound name. The relative percentage (%), sum of all components, and R Factor (goodness of fit measurement) are reported for each sample individually.

| Classification | File Name                       | Compound Name                                                                   | Supplier (if Purchased) or Synthesized | CAS        | Molecular Formula                                                             | Beamline  | Mode         | Reference         |
|----------------|---------------------------------|---------------------------------------------------------------------------------|----------------------------------------|------------|-------------------------------------------------------------------------------|-----------|--------------|-------------------|
| Pi_Al          | Pi_Al_GibbSorb_std.xmu          | Phosphate Sorbed on Gibbsite                                                    | Synthesized                            | N/A        | N/A                                                                           | SSRL 14-3 | Fluorescence | O'Day et al. 2020 |
| Pi_Ca          | Pi_Apatite_CaDefHydroxy_std.xmu | Calcium-Deficient Apatite (Low Temp)                                            | Clarkson                               | N/A        | Varies                                                                        | SSRL 14-3 | Fluorescence | This Study        |
|                | Pi_Apatite_Carbonate_std.xmu    | Carbonate Apatite                                                               | Clarkson                               | N/A        | $(\text{Ca}_{10-x}\text{Hax})(\text{PO}_4)_{6-x}(\text{CO}_3)_x(\text{OH})_2$ | CLS SXRMB | Fluorescence | Barnes, 2020      |
|                | Pi_Ca_Mono_std.xmu              | Calcium Phosphate Monobasic Monohydrate                                         | Sigma Aldrich                          | 10031-30-8 | $\text{Ca}(\text{H}_2\text{PO}_4)_2 \cdot \text{H}_2\text{O}$                 | SSRL 14-3 | Fluorescence | This Study        |
|                | Pi_Ca_Octa_std.xmu              | Octacalcium Phosphate                                                           | Clarkson                               | 13767-12-9 | $\text{Ca}_8\text{H}_2(\text{PO}_4)_6 \cdot 5\text{H}_2\text{O}$              | CLS SXRMB | Fluorescence | Barnes, 2020      |
|                | Pi_Ca_Pyro_std.xmu              | Amorphous Calcium Pyrophosphate                                                 | Aldrich                                | 7790-76-3  | $\text{Ca}_2\text{O}_7\text{P}_2 \cdot \text{H}_2\text{O}$                    | SSRL 14-3 | Fluorescence | This Study        |
|                | Pi_Ca_Tri_std.xmu               | Calcium Phosphate Tribasic                                                      | Acros Organics                         | 7758-87-4  | $\text{Ca}_3\text{O}_8\text{P}_2$                                             | SSRL 14-3 | Fluorescence | This Study        |
| Pi_Fe          | Pi_Fe_FerriSorb_std.xmu         | Phosphate Sorbed on Ferrihydrite                                                | Synthesized                            | N/A        | N/A                                                                           | SSRL 14-3 | Fluorescence | O'Day et al. 2020 |
|                | Pi_Fe_GoethSorb_std.xmu         | Phosphate Sorbed on Goethite                                                    | Synthesized                            | N/A        | N/A                                                                           | CLS SXRMB | Fluorescence | O'Day et al. 2020 |
|                | Pi_Fe_Precip_std.xmu            | Precipitated Iron Phosphate                                                     | Synthesized                            | N/A        | N/A                                                                           | CLS SXRMB | Fluorescence | Barnes, 2020      |
| Pi_K           | Pi_K_Di_std.xmu                 | Potassium Phosphate Dibasic Anhydrous                                           | Fisher                                 | 7758-11-4  | $\text{K}_2\text{HPO}_4$                                                      | SSRL 14-3 | Fluorescence | This Study        |
|                | Pi_K_Pyro_std.xmu               | Potassium Diphosphate; Potassium Pyrophosphate                                  | Acros Organics                         | 7320-34-5  | $\text{K}_4\text{P}_2\text{O}_7$                                              | SSRL 14-3 | Fluorescence | This Study        |
| Pi_Mg          | Pi_Mg_Di_std.xmu                | Magnesium Hydrogen Phosphate Trihydrate; Magnesium Phosphate Dibasic Trihydrate | Sigma Aldrich                          | 7782-75-4  | $\text{MgHPO}_4 \cdot 3\text{H}_2\text{O}$                                    | SSRL 14-3 | Fluorescence | This Study        |
|                | Pi_Mg_Tri_std.xmu               | Magnesium Phosphate Tribasic Hydrate                                            | Thermo Scientific                      | 53408-95-0 | $\text{Mg}_3(\text{PO}_4)_2 \cdot x\text{H}_2\text{O}$                        | SSRL 14-3 | Fluorescence | This Study        |
|                | Pi_NH4_Mg_std.xmu               | Ammonium Magnesium Phosphate Hydrate; Struvite                                  | Alfa Aesar                             | 7785-21-9  | $(\text{NH}_4)\text{MgPO}_4 \cdot x\text{H}_2\text{O}$                        | SSRL 14-3 | Fluorescence | This Study        |
| Pi_Na          | Pi_Na_Tri_std.xmu               | Sodium Phosphate Tribasic Dodecahydrate                                         | Fisher                                 | 10101-89-0 | $\text{H}_{24}\text{Na}_3\text{O}_{16}\text{P}$                               | SSRL 14-3 | Fluorescence | This Study        |
| Pi_NH4         | Pi_NH4_Mono_std.xmu             | Ammonium Dihydrogen Phosphate; Ammonium Phosphate Monobasic                     | Acros Organics                         | 7722-76-1  | $\text{NH}_4\text{H}_2\text{PO}_4$                                            | SSRL 14-3 | Fluorescence | This Study        |

|    |                              |                                                   |               |             |                                               |           |                      |                   |
|----|------------------------------|---------------------------------------------------|---------------|-------------|-----------------------------------------------|-----------|----------------------|-------------------|
| Po | Po_Al_DNA_GibbSorb_2_std.xmu | DNA Sorbed on Gibbsite                            | Synthesized   | N/A         | N/A                                           | CLS SXRMB | Fluorescence         | O'Day et al. 2020 |
|    | Po_Al_DNA_GibbSorb_std.xmu   | DNA Sorbed on Gibbsite                            | Synthesized   | N/A         | N/A                                           | CLS SXRMB | Fluorescence         | Barnes, 2020      |
|    | Po_Ca_Lecithin_std.xmu       | Lecithin (90% Soybean); Phosphatidylcholine       | Alfa Aesar    | 8002-43-5   | $C_{42}H_{80}NO_8P$                           | CLS SXRMB | Fluorescence         | Barnes, 2020      |
|    | Po_Fe_PA_FerriSorb_std.xmu   | Phytic Acid Sorbed on Ferrihydrite                | Synthesized   | N/A         | N/A                                           | CLS SXRMB | Fluorescence         | Barnes, 2020      |
|    | Po_Fe_PA_GoethSorb_std.xmu   | Phytic Acid Sorbed on Goethite                    | Synthesized   | N/A         | N/A                                           | CLS SXRMB | Fluorescence         | Barnes, 2020      |
|    | Po_Na_AMP_std.xmu            | Adenosine 5'-Monophosphate Sodium Salt (Yeast)    | Sigma         | 149022-20-8 | $C_{10}H_{14}N_5O_7P \cdot xNa^+ \cdot yH_2O$ | CLS SXRMB | Fluorescence         | Barnes, 2020      |
|    | Po_Na_ATP_std.xmu            | Adenosine-5'-Triphosphate Disodium Salt Hydrate   | Alfa Aesar    | 34369-07-8  | $C_{10}H_{14}N_5Na_2O_{13}P_3 \cdot xH_2O$    | CLS SXRMB | Fluorescence         | Barnes, 2020      |
|    | Po_Na_DNA_std.xmu            | Deoxyribonucleic Acid Sodium Salt (Salmon Testes) | Sigma         | 438545-06-3 | N/A                                           | CLS SXRMB | Total Electron Yield | Barnes, 2020      |
|    | Po_Na_PA_std.xmu             | Phytic Acid Sodium Salt Hydrate (Rice)            | Sigma Aldrich | 14306-25-3  | $C_6H_{18}O_{24}P_6 \cdot xNa^+ \cdot yH_2O$  | CLS SXRMB | Total Electron Yield | Barnes, 2020      |

Table S3. X-ray absorption near edge structure (XANES) reference compounds list used for linear combination fitting in Athena. Inorganic P species (Pi) were grouped based on metal association, whereas organic P (Po) species were grouped together regardless of the metal association (see XANES methodology in SI for additional details). Additional information includes file names, the full compound name, the supplier, CAS number, molecular formula, beamline data was collected on, collection mode, and citation spectra was acquired from. Additional reference compounds were used for initial linear combination fits and can be found in Grieger et al.(Grieger et al., 2022)

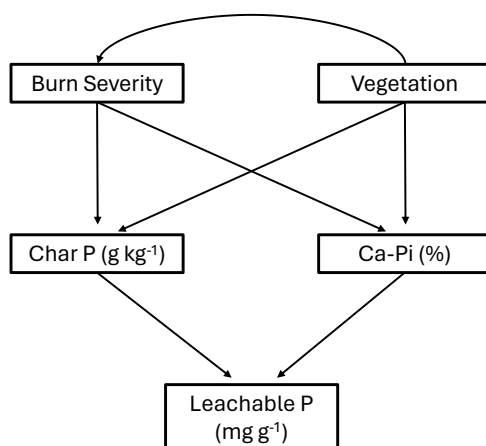

Figure S4. Path analysis conceptual model of hypothesized relationships between burn severity, vegetation type, and leachable P.

| Burn Severity | Vegetation          | Burn Duration (Minutes) | Lowest Max Temp (°C) | Highest Max Temp (°C) | n |
|---------------|---------------------|-------------------------|----------------------|-----------------------|---|
| Unburned      | Douglas-fir forest  | NA                      | 25                   | 25                    | 2 |
|               | Sagebrush shrubland | NA                      | 25                   | 25                    | 1 |
| Low           | Douglas-fir forest  | 342 (403)               | 295                  | 627                   | 5 |
|               | Sagebrush shrubland | 131 (104)               | 308                  | 512                   | 2 |
| Moderate      | Douglas-fir forest  | 456 (303)               | 589                  | 757                   | 3 |
|               | Sagebrush shrubland | 202 (3)                 | 512                  | 547                   | 2 |
| High          | Douglas-fir forest  | 783 (195)               | 589                  | 757                   | 4 |

Table S4. Burn characteristics for severity classifications for each vegetation type including mean (standard deviation) duration, mean (standard deviation) maximum temperature reached, low and high range of maximum temperature, and sample count.

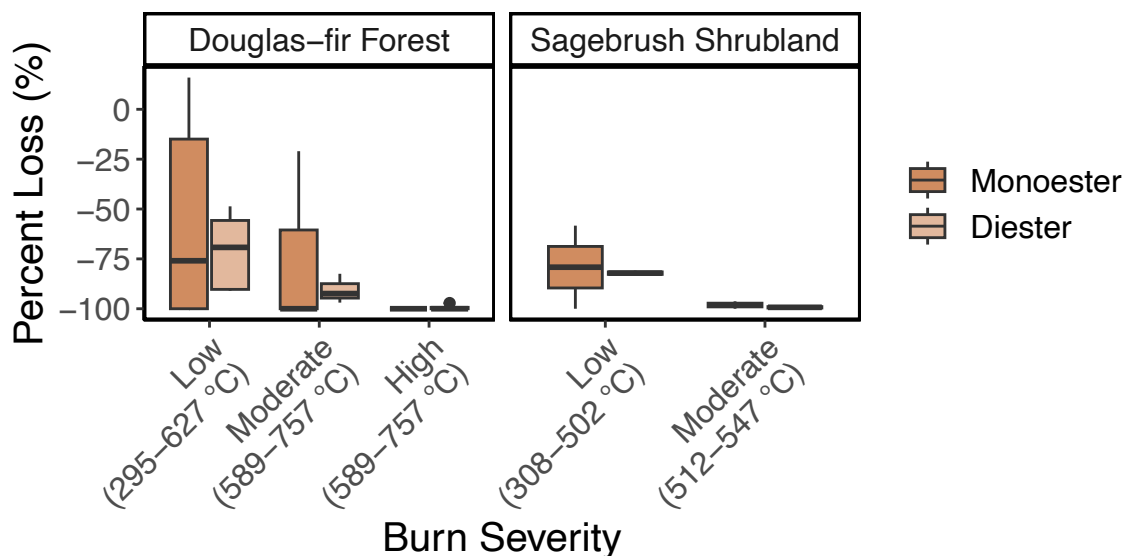

Figure S5. Percent loss of monoester (dark pink) and diester (light pink) species, as identified by  $^{31}\text{P}$  NMR. Analysis of variance found no significant difference ( $p = 0.97$ ) between organic classes for the three-factor interaction term. This indicates monoester and diester species are lost at similar proportions within a burn severity classification and vegetation type.

| Burn Severity | Vegetation          | Ortho       | PL          | RNA        | G6P       | Phytate   | DNA        | Pyro       |
|---------------|---------------------|-------------|-------------|------------|-----------|-----------|------------|------------|
| Percent (%)   |                     |             |             |            |           |           |            |            |
| Unburned      | Douglas-fir forest  | 56.8 (2.5)  | 15.9 (11.2) | 9.3 (4.03) | 0.7 (NA)  | 12.4 (NA) | 11.3 (0.8) | 2.7 (0.8)  |
|               | Sagebrush shrubland | 44.8 (NA)   | 10.7 (NA)   | 4.9 (NA)   | 2.7 (NA)  | 23.2 (NA) | 14.1 (NA)  | 1.5 (NA)   |
| Low           | Douglas-fir forest  | 73.9 (9.4)  | 3.2 (1.5)   | 7.2 (5.7)  | 0.6 (0.2) | 3.6 (0.2) | 2.4 (0.5)  | 13.6 (3.1) |
|               | Sagebrush shrubland | 79.7 (14.7) | 1.4 (0.4)   | 2.2 (2.8)  | 4.6 (NA)  | 5.5 (4.1) | 2.2 (0.7)  | 9.9 (6.2)  |
| Moderate      | Douglas-fir forest  | 87.2 (8.8)  | 1.5 (1.3)   | 2.6 (2.8)  | 0.4 (NA)  | 2.4 (NA)  | 0.8 (NA)   | 8.3 (4.7)  |
|               | Sagebrush shrubland | 97.2 (0.8)  | 0.1 (0.1)   | 0.3 (NA)   | 0         | 0         | 0          | 2.1 (1.3)  |
| High          | Douglas-fir forest  | 95.9 (1.6)  | 0.1 (0.1)   | 0.9 (NA)   | 0         | 0         | 0          | 3.8 (1.5)  |

Table S5. Mean (standard deviation) of molecular moieties identified by  $^{31}\text{P}$  NMR in Douglas-fir forest and sagebrush shrubland solid samples across the burn severity gradients. Molecular moieties include orthophosphate (ortho), phospholipids (PL), RNA, glucose-6-phosphate (G6P), phytate, DNA, and pyrophosphate (pyro).

| Burn Severity      | Vegetation          | P               | Ca               | Fe              | Al              | K                 | Mg              | Na             | S              | C                  | N               | n |
|--------------------|---------------------|-----------------|------------------|-----------------|-----------------|-------------------|-----------------|----------------|----------------|--------------------|-----------------|---|
| g kg <sup>-1</sup> |                     |                 |                  |                 |                 |                   |                 |                |                |                    |                 |   |
| Unburned           | Douglas-fir forest  | 1.29<br>(0.52)  | 4.89<br>(1.23)   | 0.52<br>(0.30)  | 0.64<br>(0.42)  | 4.57<br>(2.20)    | 0.97<br>(0.14)  | 0.17<br>(0.03) | 0.76<br>(0.22) | 340.05<br>(11.53)  | 11.05<br>(2.90) | 2 |
|                    | Sagebrush shrubland | 1.27            | 4.08             | 1.05            | 1.01            | 10.79             | 1.34            | 0.25           | 1.01           | 341.9              | 8.4             | 1 |
| Low                | Douglas-fir forest  | 1.83<br>(0.73)  | 14.75<br>(3.01)  | 0.93<br>(0.22)  | 0.95<br>(0.44)  | 7.59<br>(3.15)    | 1.66<br>(0.55)  | 0.30<br>(0.03) | 0.45<br>(0.20) | 180.18<br>(68.62)  | 4.98<br>(2.06)  | 5 |
|                    | Sagebrush shrubland | 4.91<br>(1.34)  | 18.60<br>(6.88)  | 3.55<br>(1.41)  | 3.37<br>(1.55)  | 40.84<br>(10.78)  | 4.50<br>(1.70)  | 0.69<br>(0.36) | 2.37<br>(1.06) | 200.80<br>(18.10)  | 9.35<br>(0.78)  | 2 |
| Moderate           | Douglas-fir forest  | 2.33<br>(0.71)  | 20.65<br>(5.98)  | 1.25<br>(0.87)  | 1.38<br>(0.75)  | 9.73<br>(2.66)    | 2.24<br>(0.76)  | 0.36<br>(0.14) | 0.50<br>(0.26) | 161.13<br>(100.15) | 5.47<br>(1.86)  | 3 |
|                    | Sagebrush shrubland | 14.45<br>(3.48) | 52.47<br>(12.09) | 11.01<br>(0.03) | 10.39<br>(1.20) | 118.51<br>(28.55) | 13.37<br>(1.87) | 2.10<br>(0.32) | 5.67<br>(0.88) | 154.95<br>(29.63)  | 5.30<br>(0.99)  | 2 |
| High               | Douglas-fir forest  | 6.20<br>(1.94)  | 51.60<br>(16.59) | 3.37<br>(1.29)  | 3.59<br>(1.42)  | 24.91<br>(8.00)   | 5.75<br>(1.84)  | 0.84<br>(0.31) | 1.14<br>(0.41) | 129.30<br>(46.06)  | 5.13<br>(2.83)  | 4 |

Table S6. Solid sample elemental concentration (P, Ca, Fe, Al, K, Mg, Na, S, C, and N; g kg<sup>-1</sup>) mean (standard deviation) based on burn severity and vegetation type.

| Burn Severity | Vegetation          | Sample Phase | Ca:P      | Mg:P       | Fe:P      | Al:P      | Na:P      | K:P           | S:P        | C:P           | N:P        |
|---------------|---------------------|--------------|-----------|------------|-----------|-----------|-----------|---------------|------------|---------------|------------|
| Unburned      | Douglas-fir forest  | Solid        | 3.3 (2.1) | 1.1 (0.6)  | 0.3 (0.2) | 0.7 (0.7) | 0.2 (0.1) | 2.7 (0.2)     | 0.6 (0.1)  | 732.2 (271.0) | 19.5 (2.9) |
|               |                     | Particulate  | 1.0 (0.5) | 0.6 (0.4)  | 0.6 (0.8) | 0.9 (1.1) | 0.1 (ND)  | 5.5 (5.8)     | 0.2 (0.1)  | ND (ND)       | ND (ND)    |
|               |                     | Aqueous      | 0.5 (0.2) | 0.4 (0.1)  | 0.0 (0.0) | 0.1 (0.0) | 0.7 (0.6) | 7.2 (0.9)     | 0.2 (0.0)  | 83.4 (27.2)   | 1.5 (0.3)  |
|               | Sagebrush shrubland | Solid        | 2.5 (ND)  | 1.4 (ND)   | 0.5 (ND)  | 0.9 (ND)  | 0.3 (ND)  | 6.8 (ND)      | 0.8 (ND)   | 696.5 (ND)    | 14.7 (ND)  |
|               |                     | Particulate  | 2.9 (2.0) | 3.1 (2.5)  | 3.9 (3.9) | 5.5 (5.8) | 0.5 (0.5) | 14.1 (6.9)    | 0.5 (ND)   | ND (ND)       | ND (ND)    |
|               |                     | Aqueous      | 0.8 (0.0) | 0.5 (0.0)  | 0.0 (0.0) | 0.0 (0.0) | 0.1 (0.0) | 6.1 (0.0)     | 0.6 (0.0)  | 149.5 (11.5)  | 8.0 (0.1)  |
| Low           | Douglas-fir forest  | Solid        | 6.8 (2.1) | 1.2 (0.1)  | 0.3 (0.2) | 0.7 (0.4) | 0.3 (0.1) | 3.3 (0.2)     | 0.3 (0.1)  | 295.2 (161.2) | 6.5 (2.7)  |
|               |                     | Particulate  | 7.7 (4.4) | 1.0 (0.4)  | 0.7 (0.6) | 1.1 (0.9) | 0.2 (0.2) | 3.5 (3.1)     | 0.2 (0.2)  | ND (ND)       | ND (ND)    |
|               |                     | Aqueous      | 3.1 (2.8) | 0.9 (0.3)  | 0.0 (0.0) | 0.1 (0.1) | 0.8 (0.5) | 12.5 (9.5)    | 0.4 (0.1)  | 123.6 (44.8)  | 2.3 (1.3)  |
|               | Sagebrush shrubland | Solid        | 2.9 (0.3) | 1.2 (0.1)  | 0.4 (0.1) | 0.8 (0.2) | 0.2 (0.0) | 6.6 (0.1)     | 0.5 (0.1)  | 108.3 (20.1)  | 4.3 (0.8)  |
|               |                     | Particulate  | 3.9 (1.2) | 1.1 (0.6)  | 0.5 (0.3) | 0.7 (0.4) | 0.1 (0.1) | 7.0 (4.1)     | 0.4 (0.2)  | ND (ND)       | ND (ND)    |
|               |                     | Aqueous      | 1.1 (0.4) | 0.9 (0.4)  | 0.0 (0.0) | 0.0 (0.0) | 0.3 (0.1) | 17.4 (3.4)    | 0.9 (0.5)  | 72.4 (7.5)    | 3.2 (0.2)  |
| Moderate      | Douglas-fir forest  | Solid        | 7.3 (3.0) | 1.2 (0.1)  | 0.3 (0.1) | 0.7 (0.2) | 0.2 (0.1) | 3.3 (0.2)     | 0.2 (0.1)  | 166.5 (68.5)  | 5.2 (0.6)  |
|               |                     | Particulate  | 9.2 (5.2) | 0.8 (0.3)  | 0.4 (0.2) | 0.8 (0.4) | 0.2 (0.1) | 2.5 (1.0)     | 0.1 (0.1)  | ND (ND)       | ND (ND)    |
|               |                     | Aqueous      | 3.7 (3.5) | 1.3 (0.4)  | 0.0 (0.0) | 0.2 (0.1) | 0.6 (0.4) | 18.9 (11.7)   | 0.6 (0.2)  | 87.1 (18.2)   | 1.8 (0.5)  |
|               | Sagebrush shrubland | Solid        | 2.8 (0.0) | 1.2 (0.1)  | 0.4 (0.1) | 0.8 (0.1) | 0.2 (0.0) | 6.5 (0.0)     | 0.4 (0.0)  | 27.8 (1.4)    | 0.9 (0.4)  |
|               |                     | Particulate  | 2.7 (0.1) | 0.8 (0.1)  | 0.2 (0.1) | ND (ND)   | 0.1 (0.0) | 2.3 (1.4)     | 0.1 (0.1)  | ND (ND)       | ND (ND)    |
|               |                     | Aqueous      | 4.6 (1.9) | 13.7 (7.7) | 0.0 (0.0) | ND (ND)   | 9.0 (0.9) | 529.2 (49.5)  | 36.2 (4.0) | 312.9 (129.4) | 17.1 (3.9) |
| High          | Douglas-fir forest  | Solid        | 6.6 (1.5) | 1.2 (0.0)  | 0.3 (0.1) | 0.7 (0.2) | 0.2 (0.1) | 3.2 (0.1)     | 0.2 (0.0)  | 55.9 (16.4)   | 1.9 (0.9)  |
|               |                     | Particulate  | 6.6 (1.4) | 1.0 (0.1)  | 0.2 (0.1) | 0.5 (0.1) | 0.1 (0.0) | 0.8 (0.4)     | 0.0 (0.0)  | ND (ND)       | ND (ND)    |
|               |                     | Aqueous      | 3.8 (1.2) | 2.7 (1.3)  | 0.0 (0.0) | 0.3 (0.3) | 6.2 (3.7) | 167.1 (105.1) | 12.7 (8.8) | 132.7 (177.9) | 4.3 (4.0)  |

Table S7. Molar stoichiometric ratios between Ca, Mg, Fe, Al, Na, K, S, C, and N to P. Mean and standard deviations are reported based on burn severity, vegetation type (Douglas-fir forest or sagebrush shrubland), and sample phase (solid samples, leachate particulate, or leachate aqueous).

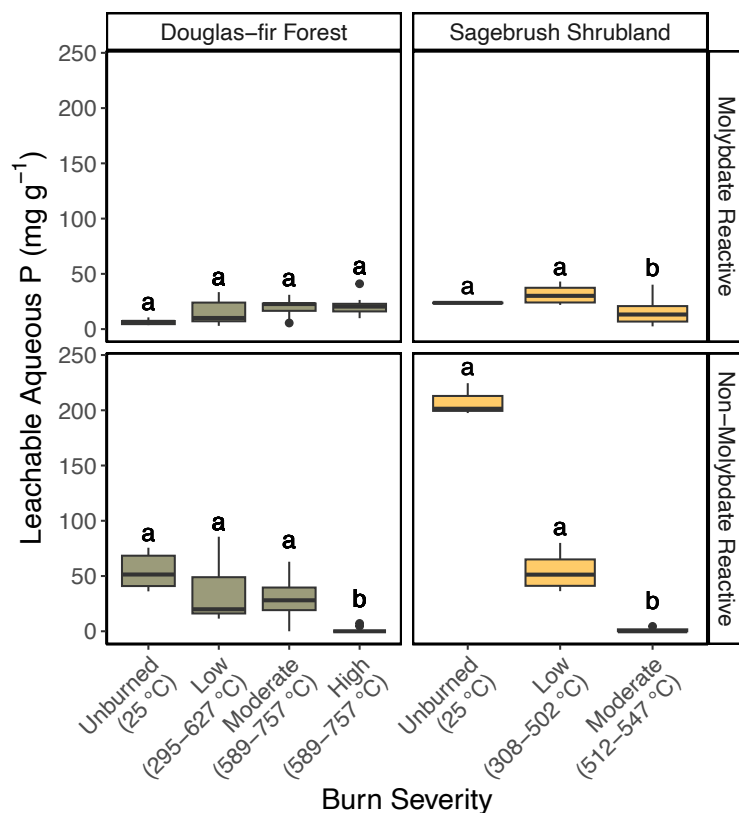

Figure S6. Leachable aqueous molybdate reactive P and non-molybdate reactive P ( $\text{mg g}^{-1}$ ) for Douglas-fir forest (green) and sagebrush shrubland (yellow) based on burn severity classifications. Letters indicate significant differences between burn severities within each vegetation type (mixed effect model post hoc test). Non-molybdate reactive P was calculated as the difference between total P measured on ICP-OES and molybdate reactive P.

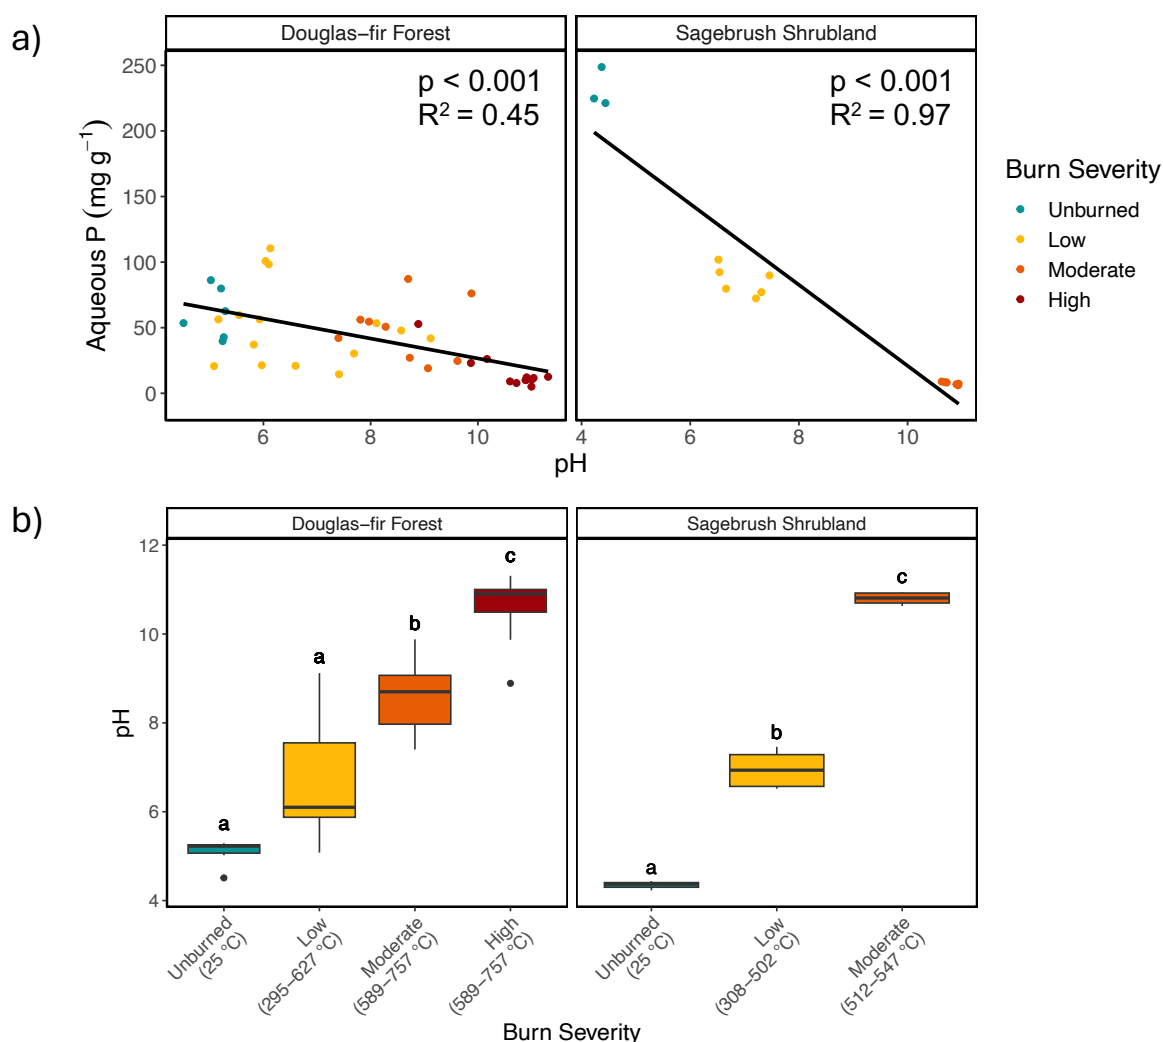

Figure S7. Relationship between a) pH and aqueous P for Douglas-fir forest and Sagebrush shrubland separately, and b) pH and burn severity, with letters representing significant ( $\alpha = 0.05$ ) differences from post hoc test within the respective vegetation types.

### References

- Cade-Menun, B. J.: Improved peak identification in <sup>31</sup>P-NMR spectra of environmental samples with a standardized method and peak library, *Geoderma*, 257–258, 102–114, <https://doi.org/10.1016/j.geoderma.2014.12.016>, 2015.
- Doolette, A. L., Smernik, R. J., and Dougherty, W. J.: Spiking improved solution phosphorus-31 nuclear magnetic resonance identification of soil phosphorus compounds, *Soil Sci. Soc. Am. J.*, 73, 919–927, <https://doi.org/10.2136/sssaj2008.0192>, 2009.

Grieger, S., Bailey, J., Barnes, M., Bladon, K. D., Forbes, B., Garayburu-Caruso, V. A., Graham, E. B., Goldman, A. E., Homolka, K., McKeever, S. A., Myers-Pigg, A., Otenburg, O., Renteria, L., Roebuck, A., Scheibe, T. D., and Torgeson, J. M.: Organic Matter Concentration and Composition of Experimentally Burned Open Air and Muffle Furnace Vegetation Chars across Differing Burn Severity and Feedstock Types from Pacific Northwest, USA (V3), <https://doi.org/10.15485/1894135>, 2022.

Kruse, J., Abraham, M., Amelung, W., Baum, C., Bol, R., Kühn, O., Lewandowski, H., Niederberger, J., Oelmann, Y., Rüger, C., Santner, J., Siebers, M., Siebers, N., Spohn, M., Vestergren, J., Vogts, A., and Leinweber, P.: Innovative methods in soil phosphorus research: A review, *J. Plant Nutr. Soil Sci.*, 178, 43–88, <https://doi.org/10.1002/jpln.201400327>, 2015.

McDowell, R. W., Cade-Menun, B., and Stewart, I.: Organic phosphorus speciation and pedogenesis: analysis by solution  $^{31}\text{P}$  nuclear magnetic resonance spectroscopy, *Eur. J. Soil Sci.*, 58, 1348–1357, <https://doi.org/10.1111/j.1365-2389.2007.00933.x>, 2007.

Prietz, J. and Klysubun, W.: Phosphorus K-edge XANES spectroscopy has probably often underestimated iron oxyhydroxide-bound P in soils, *J. Synchrotron Radiat.*, 25, 1736–1744, <https://doi.org/10.1107/S1600577518013334>, 2018.

Ravel, B. and Newville, M.: ATHENA, ARTEMIS, HEPHAESTUS: data analysis for X-ray absorption spectroscopy using IFEFFIT, *J. Synchrotron Radiat.*, 12, 537–541, <https://doi.org/10.1107/S0909049505012719>, 2005.

Recena, R., Cade-Menun, B. J., and Delgado, A.: Organic phosphorus forms in agricultural soils under Mediterranean climate, *Soil Sci. Soc. Am. J.*, 82, 783–795, <https://doi.org/10.2136/sssaj2017.10.0360>, 2018.

Turner, B. L., Mahieu, N., and Condon, L. M.: Phosphorus-31 nuclear magnetic resonance spectral assignments of phosphorus compounds in soil NaOH–EDTA extracts, *Soil Sci. Soc. Am. J.*, 67, 497–510, <https://doi.org/10.2136/sssaj2003.4970>, 2003.

Webb, S. M.: SIXpack: a graphical user interface for XAS analysis using IFEFFIT, *Phys. Scr.*, 2005, 1011, <https://doi.org/10.1238/Physica.Topical.115a01011>, 2005.

Werner F, F.: LCF: Linear Combination Fitting. R package version 1.7.0, 2017.
